# Supplementary material
Source: PubMed Central journal article supplement (PMC3432917)
Supplement: NIHMS388426-supplement-Supplemental_Figures_and_Text.pdf [file NIHMS388426-supplement-Supplemental_Figures_and_Text.pdf]

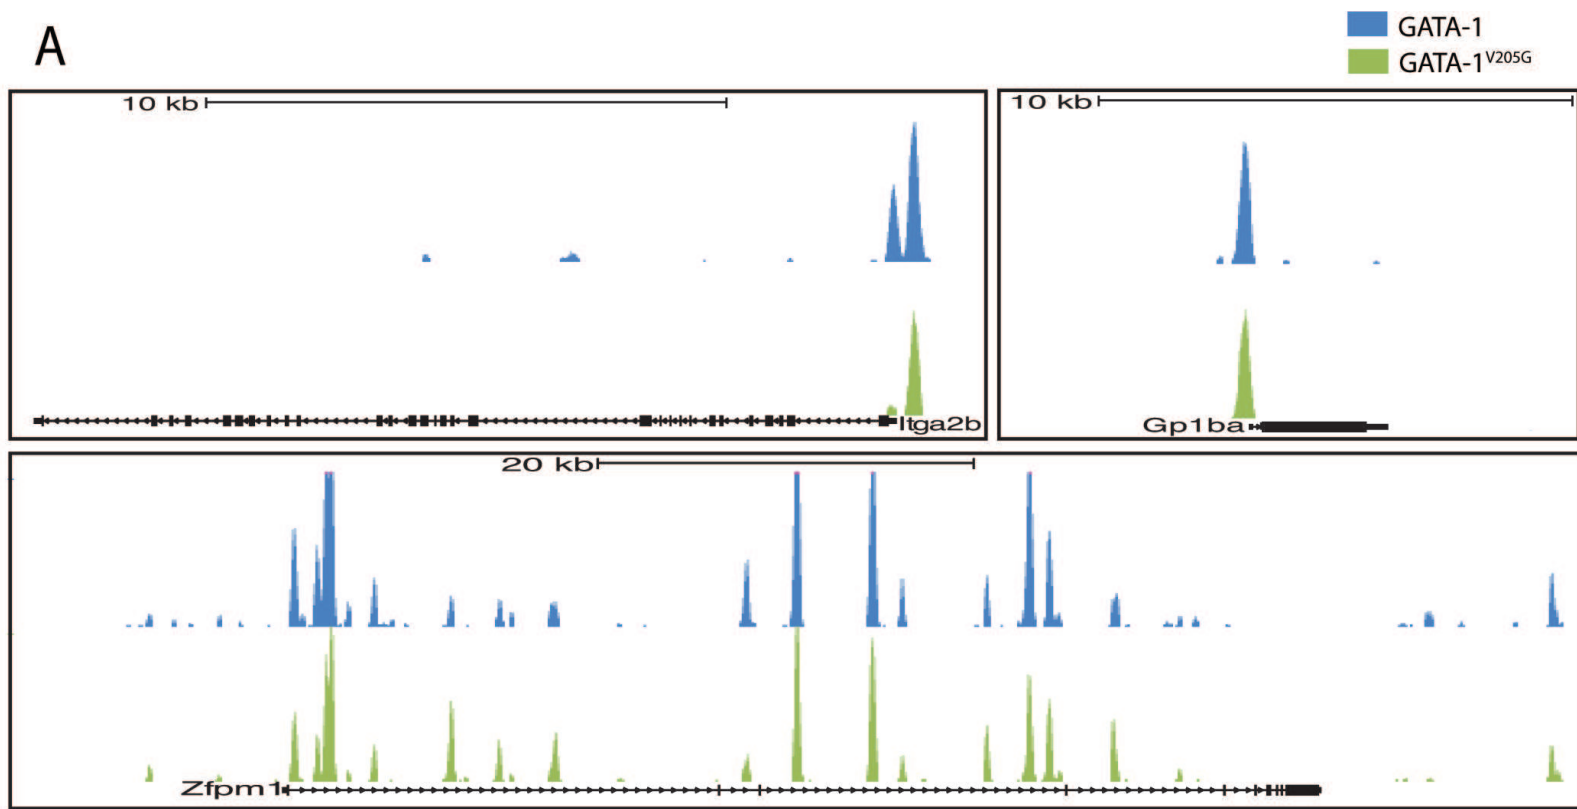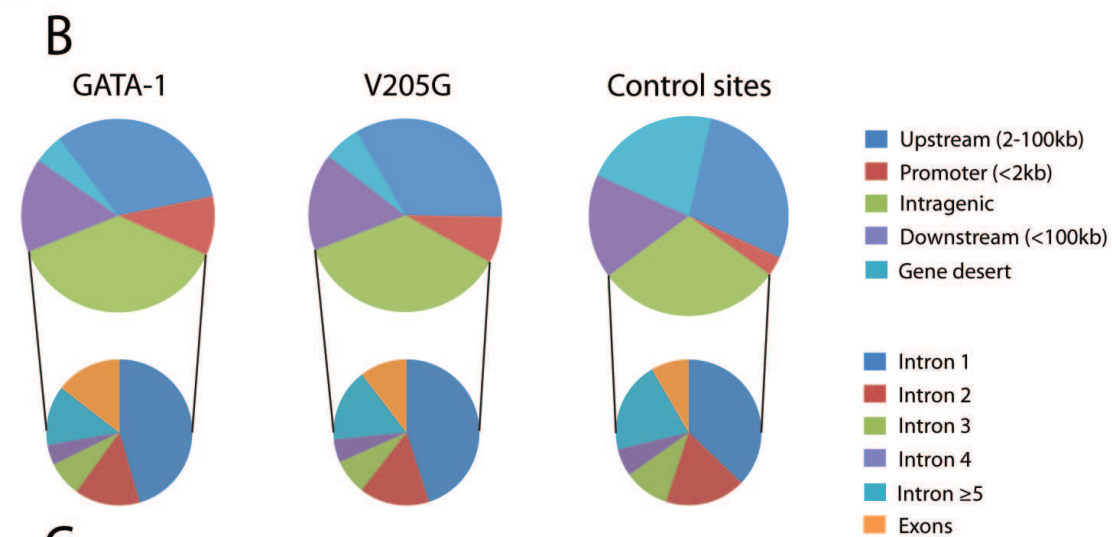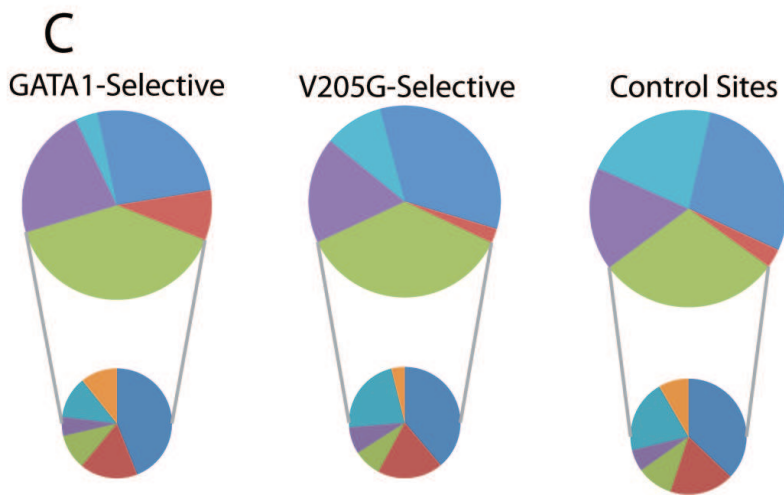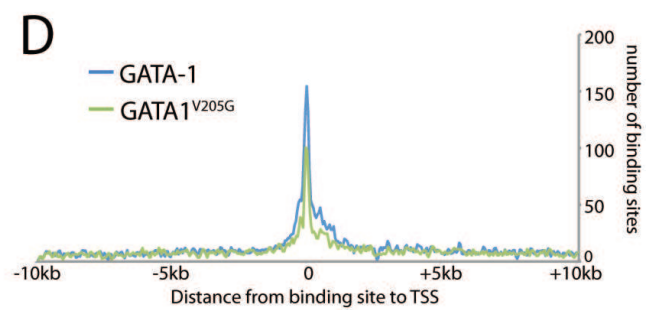

A

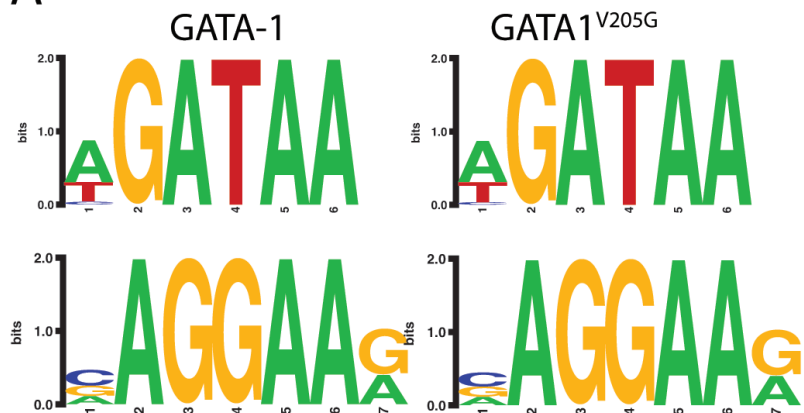

B

| Output Motif # | GATA1 Only | Sites | E-value  | Closest Match | V205G Only | Sites | E-value  | Closest Match  |
|----------------|------------|-------|----------|---------------|------------|-------|----------|----------------|
| 1              |            | 661   | 1.5E-179 | GATA-1        |            | 1232  | 3.6E-494 | GATA-1         |
| 2              |            | 677   | 8.4E-160 | GATA1         |            | 1232  | 5.8E-447 | GATA-1         |
| 3              |            | 617   | 6.8E-115 | FEV (ETS)     |            | 233   | 2.6E-41  | Tcfap2e (AP-2) |
| 4              |            | 713   | 2.5E-114 | FEV (ETS)     |            | 549   | 1.6E-27  | Myf6           |
| 5              |            | 497   | 4.6E-63  | Myf (E-box)   |            | 62    | 1.7E-12  | Zfp58          |
| 6              |            | 139   | 9.3E-22  | KLF4 (CACCC)  |            | 124   | 1.1E-7   | Zfp58          |

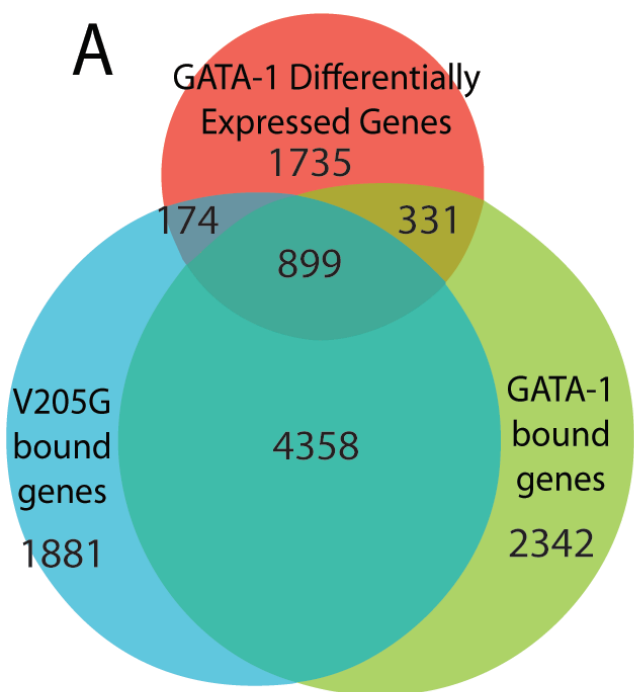

**GATA-1**

|       |     | Diff. expressed |      |
|-------|-----|-----------------|------|
|       |     | No              | Yes  |
| Bound | No  | 21033           | 1909 |
|       | Yes | 6682            | 1230 |

$\chi$ -squared= 335.26; p-value<2.2E-16

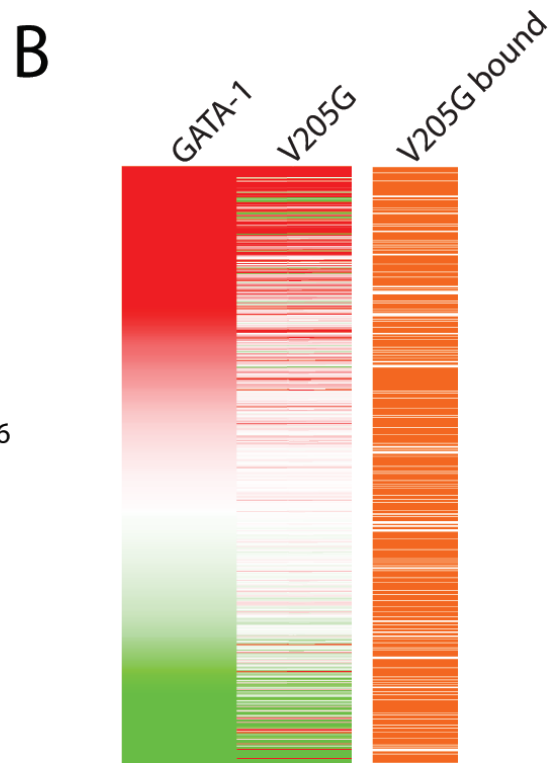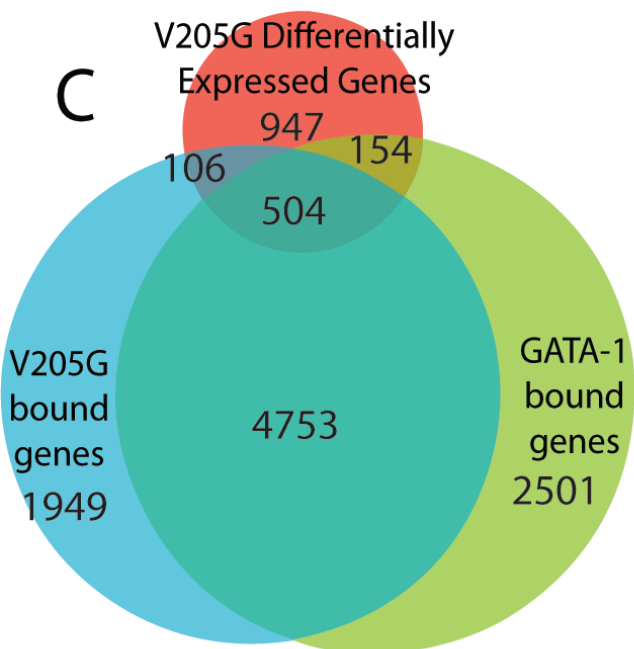

**V205G**

|       |     | Diff. expressed |      |
|-------|-----|-----------------|------|
|       |     | No              | Yes  |
| Bound | No  | 22441           | 1101 |
|       | Yes | 6702            | 610  |

$\chi$ -squared= 142.40; p-value<2.2E-16

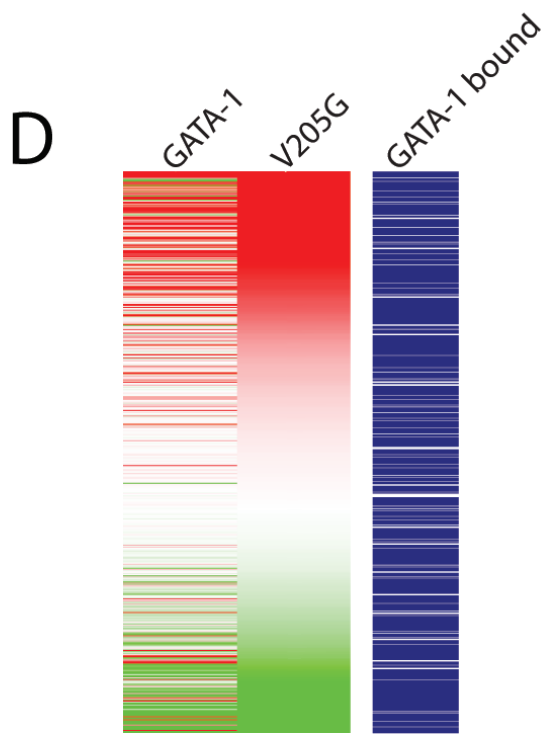

Supplemental figure 4

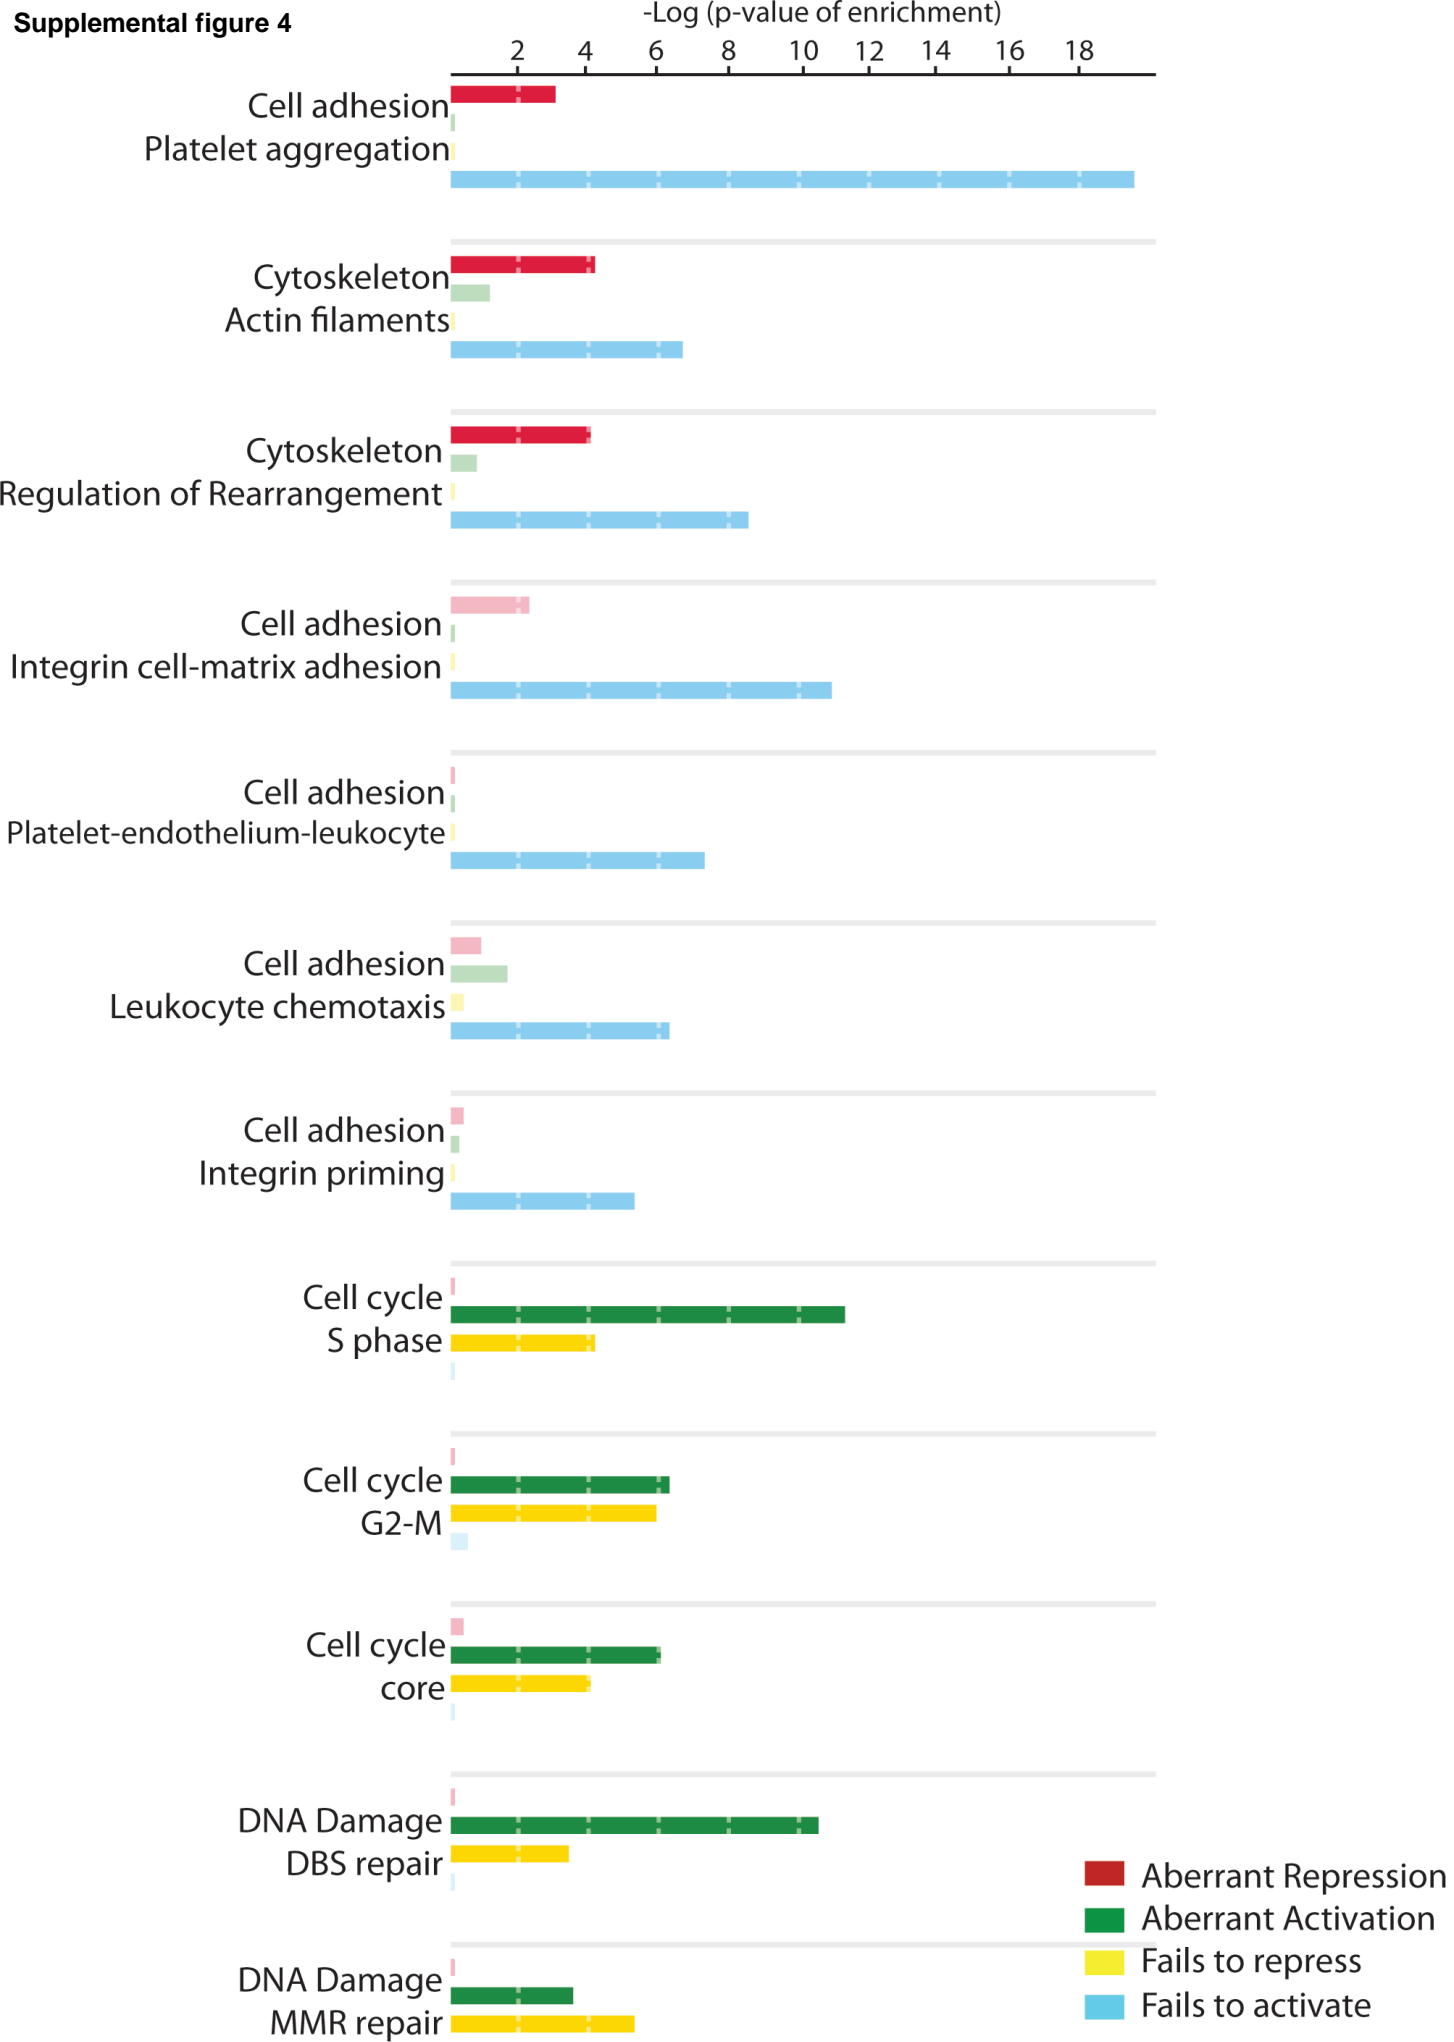

Supplemental figure 5

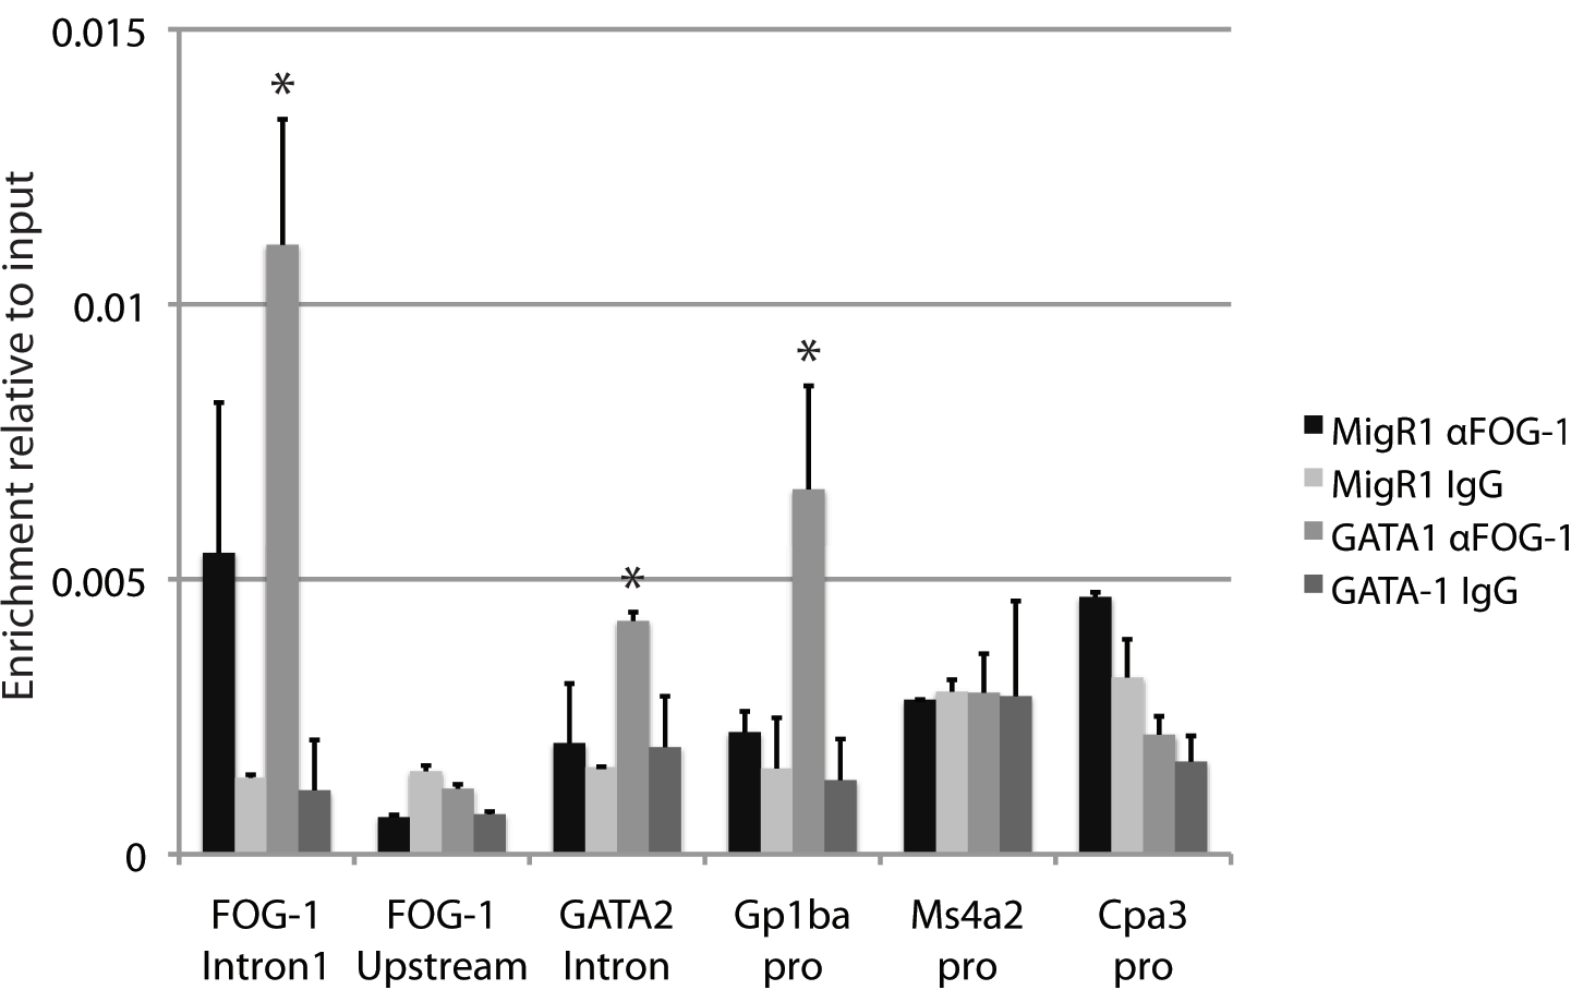

Supplemental figure 6

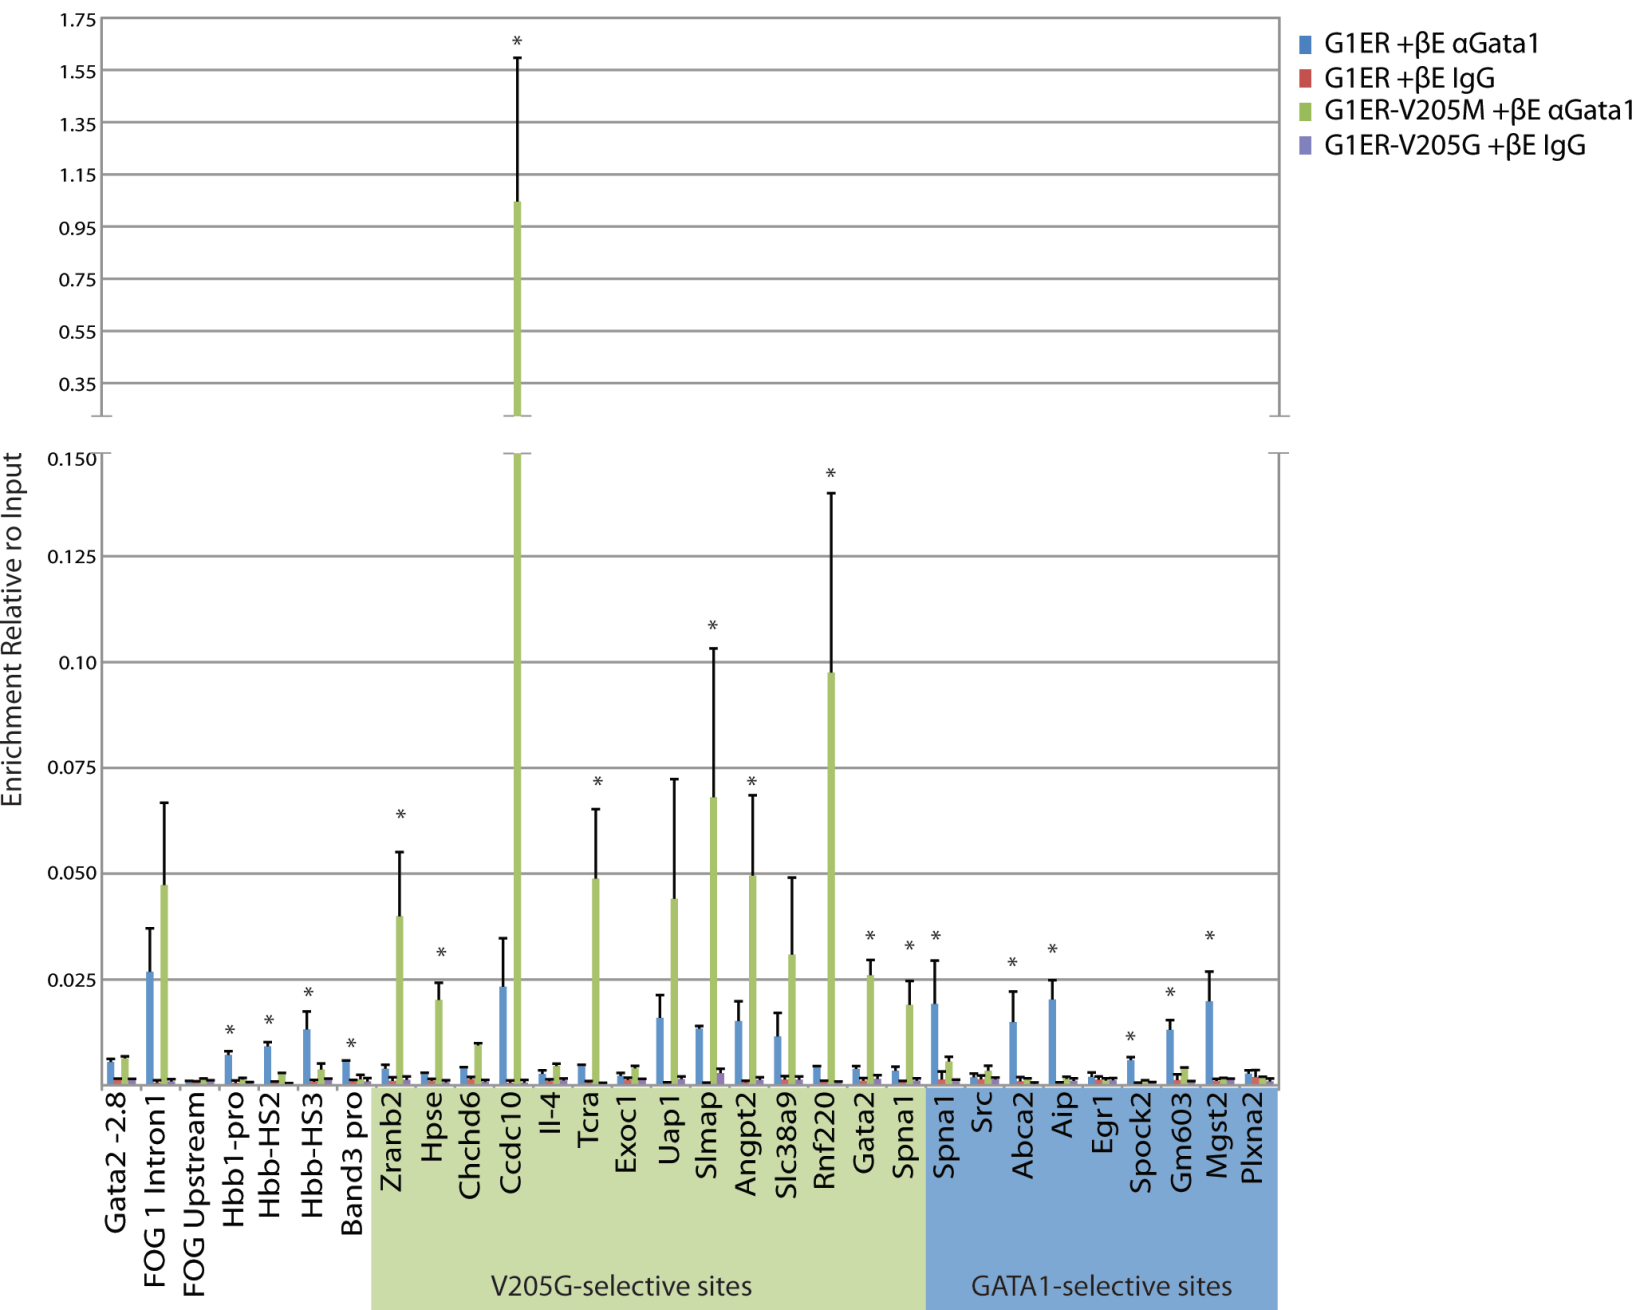

Chlon et al

**Supplemental Figure legends and tables**

**Supplemental Figure 1 (related to main figure 2): ChIP-Seq for GATA-1 and GATA-**

**1V205G in G1ME cells.** (A) GATA-1 and GATA-1V205G occupy control sites, including the *Itga2b* and *Gplba* promoters and the introns of *Zfpml*. (B) Each GATA-1 and GATA-1V205G peak was placed into a category based on its location relative to the nearest TSS: upstream (2-100kb), promoter (>2kb upstream), intragenic (exon or intron), downstream (<100kb), or gene desert (>100kb). Peaks within genes were further categorized for their presence in intron 1, 2, 3, 4, or  $\geq 5$  or an exon. Compared to a control set of peaks, GATA-1 and GATA-1V205G peaks are significantly enriched at promoters and intragenic regions and depleted at downstream and gene desert regions. (C) Each GATA1-selective and V205G-selective peak was placed into a category based on its location relative to the nearest TSS: upstream (2-100kb), promoter (<2kb upstream), intragenic (exon or intron), downstream (<100kb), or gene desert (>100kb). Peaks within genes were further categorized for their presence in intron 1, 2, 3, 4, or  $\geq 5$  or an exon. A control set of peaks was produced by randomly choosing a location on the same chromosome as every peak in the GATA-1 dataset. (D) A histogram of the frequency of GATA-1 and GATA-1V205G peaks at locations relative to the TSS. Bin size is 50bp.

**Supplemental Figure 2 (related to main figure 3): *De Novo* motif analysis reveals deficiency of ETS motifs at the V205G-selective sites.** (A) The first and second results from *de novo* motif analysis with DREME on 200bp of sequence surrounding the peak summits of the GATA-1 and GATA-1V205G peaks. (B) A chart of the first six motifs output from *de novo* motif analysis

with MEME on 200bp of sequence surrounding the peak summits of the GATA1-selective and V205G-selective peaks.

**Supplemental Figure 3 (related to main figure 5): GATA-1 and GATA-1V205G**

**differentially expressed genes are enriched for genes that are bound.** (A) Overlap of the genes that are differentially expressed by GATA-1 relative to MigR1-infected cells with genes that are bound by GATA-1 and V205G. Chi-square analysis indicates that the differentially expressed genes are enriched for GATA-1 bound genes. (B) A heatmap of the relative expression compared to MigR1 control of the genes that are bound and differentially expressed by GATA-1. The occupancy of each gene by GATA-1V205G is indicated in orange in an adjacent column. (C) Overlap of the genes that are differentially expressed by GATA-1V205G relative to MigR1-infected cells with genes that are bound by GATA-1 and V205G. Chi-square analysis indicates that the differentially expressed genes are enriched for GATA-1V205G bound genes. (D) A heatmap of the relative expression compared to MigR1 control of the genes that are bound and differentially expressed by V205G. The occupancy of each gene by GATA-1 is indicated in orange in an adjacent column.

**Supplemental Figure 4 (related to main figure 4): GATA-1 requires interaction with FOG**

**to induce megakaryocyte differentiation pathways and inhibit cell cycle.** Gene ontology analysis on the four groups of differentially expressed genes identified by hierarchical clustering. The negative log of the p-value of enrichment for each of the four groups is displayed for the 12 most enriched ontologies.



**Supplemental Figure 5 (related to main figure 6): FOG-1 is not bound at V205G-selective sites.** Chromatin immunoprecipitation for FOG-1 in MigR1 and GATA1-transduced G1ME cells. Means  $\pm$  SD are depicted. Asterisks mark sites where enrichment is significant compared to control IgG.

**Supplemental Figure 6 (related to main figure 1): The GATA-FOG interaction regulates GATA-1 chromatin occupancy in erythroid cells.** Chromatin immunoprecipitation for GATA-1 in G1ER cells expressing wild-type and V205M mutant GATA-1 treated with  $\beta$ -estradiol for 24h. The V205G-selective and GATA1-selective sites are highlighted in green and blue, respectively. Means  $\pm$  SD are depicted.

**Supplementary Table 1. Statistics for ChIP-Seq datasets.** Three biological replicate ChIPs were sequenced for each factor. Three total input samples from parental G1ME cells were sequenced.

| Sample                 | Sequencing Reads |            | Peak Calls | Bound Genes |
|------------------------|------------------|------------|------------|-------------|
|                        | Mappable         | Unique     |            |             |
| Gata1                  | 35,278,756       | 19,589,030 | 12,736     | 7,912       |
| Gata1 <sup>V205G</sup> | 37,398,428       | 19,383,347 | 11,696     | 7,312       |
| INPUT                  | 55,715,331       | 47,452,331 | --         | --          |

**Supplementary Table 2. Overlap of the GATA-1 and GATA-1V205G ChIP-Seq peaks with H3K4me3 ChIP-Seq peaks from parental G1ME cells.**

|                 | H3K4me3 peaks | X <sup>2</sup> Test against GATA-1 peaks |
|-----------------|---------------|------------------------------------------|
| GATA-1          | 33%<br>(4310) |                                          |
| V205G           | 27%<br>(3134) |                                          |
| GATA1-selective | 28%<br>(402)  | 12.94<br>(p=0.0003)                      |
| V205G-selective | 10%<br>(152)  | 253.14<br>(p=5.37E-57)                   |

Supplemental table 3

| GeneID      | chromosome | strand | gene start | gene end | region       | distance |
|-------------|------------|--------|------------|----------|--------------|----------|
| Sox17       | chr1       | -      | 4481008    | 4483816  | Gene Desert  | -108807  |
| Sox17       | chr1       | -      | 4481008    | 4483816  | Gene Desert  | -129891  |
| Mrpl15      | chr1       | -      | 4764014    | 4775768  | Gene Desert  | 131569   |
| Mrpl15      | chr1       | -      | 4764014    | 4775768  | Downstream   | 29470    |
| Tcea1       | chr1       | +      | 4847894    | 4887985  | Promoter     | -188     |
| Tcea1       | chr1       | +      | 4848118    | 4880877  | gene         | 16112    |
| Rb1cc1      | chr1       | +      | 6204742    | 6265656  | Promoter     | -242     |
| Sgk3        | chr1       | +      | 9788210    | 9892649  | Upstream (10 | -17619   |
| Cops5       | chr1       | -      | 10014911   | 10027979 | gene         | 63       |
| Sulf1       | chr1       | +      | 12682609   | 12850453 | Upstream (10 | -47763   |
| Prdm14      | chr1       | -      | 13103508   | 13115937 | Upstream (10 | -28843   |
| Prdm14      | chr1       | -      | 13103508   | 13115937 | Gene Desert  | -102666  |
| AK171953    | chr1       | -      | 13333668   | 13337135 | Downstream   | 87305    |
| AK171953    | chr1       | -      | 13333668   | 13337135 | Downstream   | 79443    |
| AK171953    | chr1       | -      | 13333668   | 13337135 | Upstream (2- | -5978    |
| Ncoa2       | chr1       | -      | 13129239   | 13362520 | gene         | 5121     |
| Tram1       | chr1       | -      | 13554782   | 13579945 | gene         | 15540    |
| Lactb2      | chr1       | -      | 13615979   | 13650590 | gene         | 25       |
| Eya1        | chr1       | -      | 14159038   | 14294651 | gene         | 29803    |
| Eya1        | chr1       | -      | 14159038   | 14294651 | Upstream (10 | -69069   |
| Eya1        | chr1       | -      | 14159038   | 14294651 | Gene Desert  | -179962  |
| Terf1       | chr1       | +      | 15795738   | 15833510 | gene         | 511      |
| Rdh10       | chr1       | +      | 16095962   | 16122631 | Downstream   | 49151    |
| Ube2w       | chr1       | -      | 16530870   | 16609367 | gene         | 7205     |
| Ly96        | chr1       | +      | 16678536   | 16699680 | gene         | 10458    |
| Jph1        | chr1       | -      | 16987544   | 17087879 | gene         | 86994    |
| AK205147    | chr1       | +      | 20793092   | 20793462 | Upstream (2- | -7843    |
| Efhc1       | chr1       | +      | 20941768   | 20980920 | gene         | 6774     |
| Efhc1       | chr1       | +      | 20941768   | 20980920 | gene         | 21969    |
| Efhc1       | chr1       | +      | 20941768   | 20980920 | Downstream   | 42728    |
| Tram2       | chr1       | -      | 20991458   | 21069306 | gene         | 26792    |
| Tram2       | chr1       | -      | 20991458   | 21069306 | gene         | 13890    |
| Tram2       | chr1       | -      | 20991458   | 21069306 | Upstream (10 | -10876   |
| Tram2       | chr1       | -      | 20991458   | 21069306 | Upstream (10 | -22236   |
| Gsta3       | chr1       | +      | 21230669   | 21255640 | Downstream   | 26156    |
| CS444445    | chr1       | +      | 23298552   | 23298575 | Upstream (2- | -8955    |
| Ogfrl1      | chr1       | -      | 23373262   | 23390014 | Promoter     | -448     |
| Smap1       | chr1       | -      | 23851684   | 23916575 | gene         | 9966     |
| Smap1       | chr1       | -      | 23855633   | 23916575 | Upstream (2- | -5974    |
| Smap1       | chr1       | -      | 23852465   | 23929128 | gene         | 483      |
| Lmbrd1      | chr1       | +      | 24685764   | 24823146 | Promoter     | -163     |
| 4930521A18I | chr1       | +      | 31279683   | 31281132 | Gene Desert  | 155879   |
| Prim2       | chr1       | -      | 33510655   | 33726603 | gene         | 19797    |
| Zfp451      | chr1       | -      | 33818597   | 33871272 | gene         | 582      |
| Bpag1       | chr1       | +      | 34344031   | 34365497 | Upstream (10 | -24975   |
| Ccdc115     | chr1       | -      | 34493520   | 34496517 | Downstream   | 4546     |
| Imp4        | chr1       | +      | 34496744   | 34502592 | Promoter     | -69      |
| AK016244    | chr1       | -      | 34534219   | 34542456 | gene         | 980      |
